# Supplementary material for: Proliferating Astrocytes in Primary Culture Do Not Depend upon Mitochondrial Respiratory Complex I Activity or Oxidative Phosphorylation
Source: MDPI journal article supplement (doi:10.3390/cells12050683), 2023-02-21
Supplement: s1 [file s1]

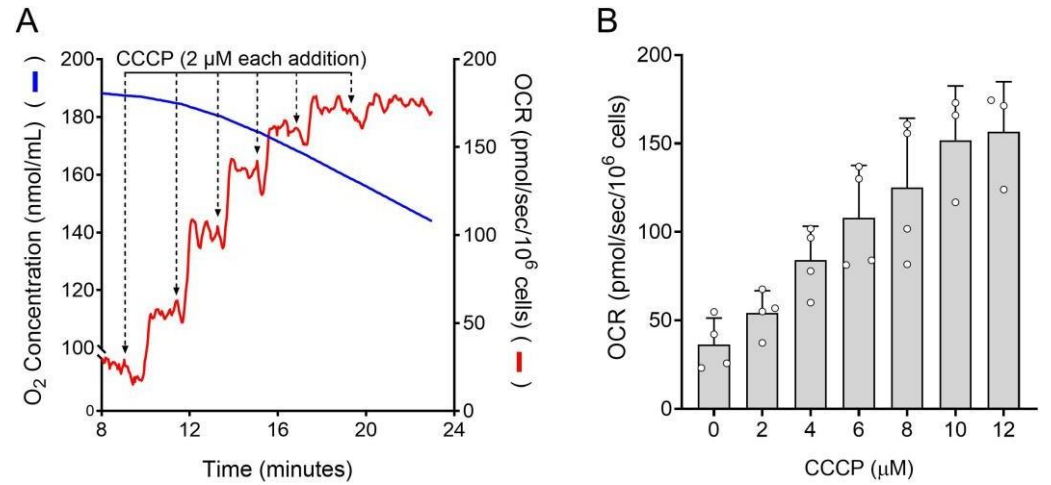

**Figure S1.** Maximum oxygen consumption rate (OCR) of astrocytes in suspension. Astrocytes ( $7.5 \times 10^5/\text{mL}$ ) were suspended in Medium 3 containing 20 mM HEPES- $\text{Na}^+$  and the OCR was monitored in a high-resolution oxygraph. **A)** Representative trace of OCR in suspended astrocytes. As indicated by the arrows, additions of 2  $\mu\text{M}$  CCCP were made until reaching the OCR maximum. **B)** OCR values under different concentrations of CCCP (2–12  $\mu\text{M}$ ).
